# Supplementary material
Source: PubMed Central journal article supplement (PMC3340057)
Supplement: 1118058109_pnas.201118058SI.pdf [file 1118058109_pnas.201118058SI.pdf]

# Supporting Information

Sittl et al. 10.1073/pnas.1118058109

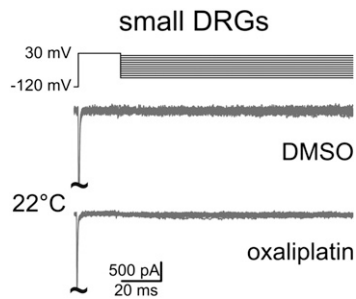

**Fig. S1.** Mediate persistent ( $I_{NaP}$ ) and resurgent currents ( $I_{NaR}$ ) are not apparent in small diameter dorsal root ganglion (DRG) neurons and are not affected by oxaliplatin. Representative whole-cell currents in response to a series of voltage commands (*Upper*) from small diameter ( $20.3 \pm 0.8 \mu\text{m}$ ,  $n = 12$ ) DRG neurons from wild-type mice after incubation with vehicle or oxaliplatin ( $30 \mu\text{M}$ ,  $\sim 90$  min). Neither tetrodotoxin-sensitive (TTX-s)  $I_{NaR}$  nor  $I_{NaP}$  were observed in any of the 12 neurons following vehicle or oxaliplatin. Postnatal day (P) 14–25 mice were used.

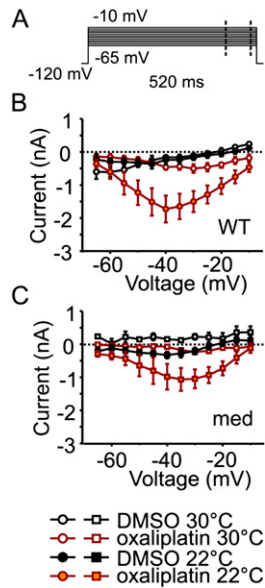

**Fig. S2.** Oxaliplatin ( $30 \mu\text{M}$ , 90 min) at  $22^\circ\text{C}$  induces  $I_{NaP}$  in large DRG neurons. (A) Single-step voltage protocol to assess the voltage-dependence of persistent current. Persistent current was determined as the mean current over a 75-ms period between 420 and 495 ms indicated by the broken vertical lines. (B) Persistent current amplitude as a function of voltage for large-diameter DRGs from wild-type mice was larger in the presence of oxaliplatin at  $22^\circ\text{C}$ . (C) Persistent current amplitude as a function of voltage for large-diameter DRGs from *Scn8a*<sup>med/med</sup> mice were similarly larger in the presence of oxaliplatin at  $22^\circ\text{C}$ , but not as prominently as in DRG neurons from wild-type mice ( $n = 5\text{--}15$ , P14–P25).



**Table S1. Repetitive activity in single axons in mouse saphenous nerve during cooling following exposure to oxaliplatin (100  $\mu$ M, 90 min)**

| Genotype                                                                  | Parameter                                              | A $\beta$ -fibers | A $\delta$ -fibers | C-fibers      |
|---------------------------------------------------------------------------|--------------------------------------------------------|-------------------|--------------------|---------------|
| Control ( <i>Scn8a</i> <sup>+/+</sup> and <i>Scn8a</i> <sup>+/med</sup> ) | <i>fibers showing repetitive activity/total fibers</i> | 7/7               | 13/13              | 0/16          |
|                                                                           | Conduction velocity (m/s)                              | 8.7 $\pm$ 0.9     | 4.0 $\pm$ 1.7      | 0.7 $\pm$ 0.4 |
| <i>Scn8a</i> <sup>med/med</sup>                                           | <i>fibers showing repetitive activity/total fibers</i> | 0                 | 0/6                | 0/9           |
|                                                                           | Conduction velocity (m/s)                              | 0                 | 3.8 $\pm$ 0.6      | 0.7 $\pm$ 0.4 |

Fiber classification by conduction velocity (m/s): A $\beta$   $\geq$  7; 7 > A $\delta$  > 2; C  $\leq$  2. Data from 32 mice; age: 14–141 d (34.5  $\pm$  35.5 d); weight: 3.0–30.4 g (13.1  $\pm$  8.5 g). For *Scn8a*<sup>med</sup> mice that die around P20, axons with A $\beta$  conduction velocities are not present.

**Table S2. Mouse sural nerve excitability parameters before (control) and after oxaliplatin (100  $\mu$ M, 90 min)**

| Parameter or threshold                     | Parameter                                  | Control          | Oxaliplatin      | <i>P</i> value |
|--------------------------------------------|--------------------------------------------|------------------|------------------|----------------|
| Parameters sensitive to membrane potential | Current to evoke 50% max. CAP ( $\mu$ A)   | 2.9 $\pm$ 0.4    | 2.9 $\pm$ 0.5    | 0.59           |
|                                            | Rheobase current ( $\mu$ A)                | 1.6 $\pm$ 0.3    | 1.7 $\pm$ 0.3    | 0.27           |
|                                            | Strength-duration time constant ( $\mu$ s) | 315.8 $\pm$ 50.2 | 299.6 $\pm$ 38.7 | 0.26           |
|                                            | Superexcitability at 7 ms (%)              | 2.8 $\pm$ 2.6    | 3.6 $\pm$ 2.6    | 0.77           |
| TE d- depolarizing h- hyperpolarizing      | TEd 10–20ms (%)                            | 39.8 $\pm$ 2.8   | 46.3 $\pm$ 2.4   | <0.01          |
|                                            | TEd 90–100ms (%)                           | 31.6 $\pm$ 2.6   | 40.0 $\pm$ 2.8   | <0.01          |
|                                            | TEh 20–40ms (%)                            | –78.5 $\pm$ 10.0 | –79.6 $\pm$ 10.9 | 0.41           |
|                                            | TEh 90–100ms (%)                           | –86.4 $\pm$ 12.6 | –85.7 $\pm$ 13.4 | 0.63           |

Threshold electrotonus (TE) parameters were determined using polarizing currents set to  $\pm$  40% of the unconditioned threshold. Values presented as mean  $\pm$  SEM, *n* = 9; age: 122–194 d (163.8  $\pm$  63.9 d); weight: 24.4–34.0 g (27.9  $\pm$  3.1 g). Recording temperature: 25.5  $\pm$  1  $^{\circ}$ C. CAP, compound action potential.

**Table S3. Results from Boltzmann fits to the voltage-dependence of activation and steady-state fast inactivation of TTX-s sodium currents in large diameter DRG neurons**

| Temperature     | Condition                | Activation                    |               |          | Steady-state fast inactivation |               |          |
|-----------------|--------------------------|-------------------------------|---------------|----------|--------------------------------|---------------|----------|
|                 |                          | <i>V</i> <sub>half</sub> (mV) | Slope         | <i>n</i> | <i>V</i> <sub>half</sub> (mV)  | Slope         | <i>n</i> |
| 30 $^{\circ}$ C | DMSO                     | –37.2 $\pm$ 2.7               | 5.7 $\pm$ 0.5 | 10       | –77.5 $\pm$ 2.5                | 9.6 $\pm$ 0.8 | 10       |
|                 | Oxaliplatin (30 $\mu$ M) | –41.3 $\pm$ 1.7               | 4.6 $\pm$ 0.9 | 4        | –70.2 $\pm$ 3.4                | 8.5 $\pm$ 0.7 | 6        |
| 22 $^{\circ}$ C | DMSO                     | –39.0 $\pm$ 1.9               | 5.2 $\pm$ 0.5 | 12       | –73.8 $\pm$ 2.5                | 9.8 $\pm$ 0.8 | 11       |
|                 | Oxaliplatin (30 $\mu$ M) | –37.5 $\pm$ 2.1               | 5.2 $\pm$ 0.8 | 5        | –73.0 $\pm$ 2.6                | 9.6 $\pm$ 1.3 | 6        |

ANOVA revealed no statistically significant differences between or within temperature and treatment.
